# Supplementary material for: “There Needs To Be More People Sharing That Information Across the Nation”: Opportunities to Promote HIV Pre-Exposure Prophylaxis Awareness and Uptake among People Releasing from Jail or Prison
Source: Research Square preprint supplement (doi:10.21203/rs.3.rs-10182163/v1), 2026-07-16
Supplement: Supplementary file 1 [file 3974c78148f21d6d49a22000.docx]

***Mapping a behavioral economics-informed intervention to promote linkage to HIV prevention and behavioral health services for people releasing from jails and prisons in Washington State***

**Individual Interview Topic Guide for Persons with Lived Experience of Release**

**Interviewer Instructions:**

The following is a guide. It is meant to facilitate a conversation with the interviewee, rather than being a rigid structure to follow. Try to ask questions below in the order given, but it is more important to maintain the flow of discussion. Suggested probes have been included.

**************************************************************************************************

**Before turning on the recorder, start with the following introductory script:**

We're not including your name on the recording on the discussion. We're just basically giving people an ID You are Number_____. Please note there are no wrong answers, we value your genuine opinions, and feedback. So, thanks for agreeing to participate in the interview on how people, at risk for HIV can best be connected to HIV prevention and behavioral health services upon released from prison or jail.

We're interested in hearing about your experiences as a person who was recently released from prison or jail may be at high risk for HIV, due to sexual, as well as mental health challenges or substance/ injection behaviors use disorders.

We're particularly interested in your thoughts where you see gaps or barriers in service that people face on release from jail or prison.

In what ways do you feel that the linkage to HIV prevention services can improve other health outcomes in the community.

**Is it okay if I record our discussion?**[Wait for the participant to give verbal consent to recording]

**I am turning on the recorder now.**[If participant prefers not to be recorded, take detailed notes instead.]

**************************************************************************************************

**Before beginning interview questions, please read the following script for the recording:**

*Today is [day of week], [month, day, year] and it is now [time of day]. This is interview [ID number] conducted at [discussion location].*

*We have reviewed the consent form. Do you have any questions about the risks and benefits of participation?*

*Do you consent to participate in this recorded interview?*

**You are now ready to begin asking the questions outlined below.**

***Background questions***

- 1. How long ago were you last in prison or jail? Please estimate the date you were released.
  2. Were you incarcerated in prison or jail?
  3. What is your age?
  4. What is your gender identity?
  5. What best describes your racial background?
  6. Do you identify as Hispanic or Latino/a/x?
  7. What is your highest level of education?

1. **What were your hopes and goals when you were released from jail or prison?**
   1. Probe about
      1. Who was in their life/relationships?
      2. Who did want to see?
2. **What were you concerned about?**
3. **We are particularly interested in learning about how people think about risk for getting HIV and about HIV prevention when they are releasing from jail or prison – what do you think about this?**
   1. Probe about
      1. Whether they thought about HIV risk and any measures taken to reduce risk
      2. STI risk and any measures taken to reduce risk Injection drug use risk and any measures taken to reduce risk.
   2. One thing that can be done to prevent HIV is a medication called pre-exposure prophylaxis or PrEP. This is either a daily pill or an injection given every other month that prevents people from getting HIV. Have you heard about this? What do you think about this?
      1. Probe about
         1. Do you think would be useful for you or others in your community What would make it possible for people to take this medication?
         2. Would you be motivated take this medication? Why?
         3. If you were going to start taking PrEP, where would you want to get it?
         4. What would get in the way of you or other people taking this medication?
         5. What would make it easier for you to take this medication?
         6. Would you have wanted to have access to this medication, either before or during after releasing from prison/jail? Why or why not?
4. **What was going through your mind the day you were released? Did you have any immediate plans, and if not, what is the reason?**
5. **Tell us about your daily life, and how do you spend your day?**
   1. Probe about
      1. Conditions of community supervision (probation/parole)
      2. Substance use
      3. Housing
      4. Transportation
      5. Employment
      6. Relationships
      7. Of the things you listed would you prioritize some of them over others
6. **Were you thinking about your health, and did you have any concerns when you were released from jail or prison?**
   1. Probe about
      1. What if any were your health concerns?
         1. Physical health
         2. Mental health
         3. Substance use
      2. How important was health relative to other things in your life (use a scale if appropriate to conversation)
      3. Whether they engaged with any health services
         1. What kinds of people or settings have made you feel uncomfortable, excluded?
         2. What kinds of people or places have made you feel welcome, included?

If so, what services?

- - - 1. How did you find out about them?
      2. What got in the way of engaging with those services?
      3. What helped?

1. ***Wrap up questions.***

| ***Context (for research team; not to be read to participant)*** | **Question** |
| --- | --- |
| *Given that analysis will be happening iteratively as data is collected, later participants will be asked to reflect on any developing frameworks or links.* | As we have been taking with persons who have some risk for HIV and experience of releasing from jail or prison, we have noticed X, Y, Z.  Does that resonate with your experience?  Does anything about that seem incorrect?  What are we missing?  Do you have any suggestions for people we should talk to with for more information? |
| *We would like to hold one or two community meetings to present results, once we have those.* | Would you be interested in attending a meeting to hear our results? |
